## PERSPECTIVAS

### EDITORIALES

- 1 Los ojos como las ventanas de la mente**  
*Simon Baron-Cohen, Ph.D.*
- 3 Anomalías neurometabólicas en la depresión resistente al tratamiento**  
*Sanjay J. Mathew, M.D., Marijn Lijffijt, Ph.D.*
- 6 Progresando para simplificar el diagnóstico del trastorno disfórico premenstrual**  
*C. Neill Epperson, M.D., Liisa V. Hantsoo, Ph.D.*
- 8 Diagnosticando manía en la era del DSM-5**  
*Joseph R. Calabrese, M.D., et al.*

### CONFERENCIA DE CASO CLÍNICO

-  **11 Desambiguando las secuelas psiquiátricas de la enfermedad de Parkinson, la estimulación cerebral profunda y los eventos de la vida: Reporte de Caso y revisión de la literatura**  
*Rachel A. Davis, M.D., et al.* [EMC](#) • [AUDIO](#) • [GUÍAS CLÍNICAS](#)

### IMÁGENES EN PSIQUIATRÍA

- 16 Yoga: Pasado y presente**  
*Ananda K. Pandurangi, M.D., et al.*

### RESÚMENES Y RESEÑAS

-  **18 Medicamentos hipnóticos y suicidio: Riesgo, mecanismos, mitigación y la FDA**  
*W. Vaughn McCall, M.D., M.S., et al.* [AUDIO](#) • [GUÍAS CLÍNICAS](#)

## NUEVAS INVESTIGACIONES

### ARTÍCULOS

- 26 Mecanismos de atención reducida a los ojos en autismo**  
*Jennifer M. Moriuchi, M.A., et al.* [EDITORIAL](#) • [EMC](#) • [AUDIO](#) • [VIDEO](#)
- 36 El transportador de norepinefrina en el trastorno depresivo mayor: Un estudio PET**  
*Sho Moriguchi, M.D., et al.*
- 42 Trastornos neurometabólicos: Anomalías potencialmente tratables en pacientes con depresión refractaria al tratamiento y comportamiento suicida**  
*Lisa A. Pan, M.D., et al.* [EDITORIAL](#) • [AUDIO](#) • [GUÍAS CLÍNICAS](#)
-  **51 Hacia el diagnóstico confiable del trastorno disfórico premenstrual del DSM-5: El sistema de puntuación para la evaluación premenstrual C-PASS (*Carolina Premenstrual Assessment Scoring System*)**  
*Tory A. Eisenlohr-Moul, Ph.D., et al.* [EDITORIAL](#) • [EMC](#) • [AUDIO](#) • [GUÍAS CLÍNICAS](#)
- 60 Alteraciones del volumen subcortical claramente definidas en el TOC pediátrico y adulto: Un meta- y mega-análisis mundial**  
*Premika S.W. Boedhoe, M.Sc., et al.* [VIDEO](#)
- 70 El aumento de la actividad o de la energía como un criterio primario para el diagnóstico de la manía bipolar en el DSM-5: Hallazgos del estudio STEP-BD**  
*Rodrigo Machado-Vieira, M.D., Ph.D., et al.* [EDITORIAL](#) • [AUDIO](#) • [GUÍAS CLÍNICAS](#)

**CARTAS AL EDITOR**

- 77 **Suicidio con arma de fuego en los Estados Unidos desde una perspectiva preventiva más amplia**  
*Nestor D. Kapusta, M.D., P.D., Robert J. Cramer, Ph.D.*
- 78 **Mejorando la seguridad con respecto a las armas de fuego en los Estados Unidos: Respuesta a Kapusta y Cramer**  
*J. John Mann, M.D., Christina A. Michel, B.A.*
- 79 **El dolor como predictor del trastorno por consumo de opiáceos**  
*Xiulu Ruan, M.D., et al.*
- 79 **Distinción entre dependencia fisiológica y el trastorno por consumo de sustancias: Respuesta a Ruan et al.**  
*Carlos Blanco, M.D., Ph.D., et al.*

**ACTOS OFICIALES**

- 81 **Cirugía bariátrica y atención psiquiátrica**  
*Sanjeev Sockalingam, M.D., M.H.P.E., et al.*

**OTROS TEMAS DE INTERÉS**

- 80 **[Correction]**
- 83 **Educación Médica Continuada**

**Cubierta:** [Perturbed attention to social features may represent an important psychological correlate of autism. However, it is unclear if this reflects aversive or indifferent responses to social features. Moriuchi and colleagues (p. 26) use sophisticated eye-tracking techniques to test these alternative possibilities among 86 two-year-olds, including 26 with autism (copyright George Rudy, Shutterstock).]

Article content that addresses **Core Competencies**, defined by the Accreditation Council of Graduate Medical Education and the American Board of Medical Specialties, is indicated by the following symbols:

-  Professionalism
-  Patient Care and Procedural Skills
-  Medical Knowledge
-  Practice-Based Learning and Improvement
-  Interpersonal and Communication Skills
-  Systems-Based Practice.

More information is available at [www.abms.org/maintenance\\_of\\_certification/MOC\\_competencies.aspx](http://www.abms.org/maintenance_of_certification/MOC_competencies.aspx)

**La Tabla de Contenidos y resúmenes de Este Número Está Disponible en Español**

*(This issue's Table of Contents and abstracts are available in Spanish)*

Translation presented in collaboration with the Office of Global Health, Rutgers-Robert Wood Johnson Medical School

Support for this effort provided by ACTA Colombia.

**Translation courtesy of**

**Sergi Casals, M.A.**, Garuna, Medellín, Colombia ([www.garunaeditors.com](http://www.garunaeditors.com))

**Carlos Lopez Jaramillo, M.D.**, Universidad de Antioquia, Medellín, Colombia

**Javier I. Escobar, M.D., M.Sc.**, Rutgers-Robert Wood Johnson Medical School

- AUDIO** Highlighted in AJP Audio, a downloadable .mp3 file available at [ajp.psychiatryonline.org](http://ajp.psychiatryonline.org)
- EMC** A course covering the content of this article is available online for paid subscribers to the AJP CME Course program
- EDITORIAL** Discussed in one of the issue's editorials
- GUÍAS CLÍNICAS** Clinical Guidance provided on the English table of contents
- VIDEO** Highlighted online by Deputy Editor Daniel S. Pine, M.D.

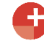

## Medicamentos hipnóticos y suicidio: Riesgo, mecanismos, mitigación y la FDA

W. Vaughn McCall, M.D., M.S., Ruth M. Benca, M.D., Ph.D., Peter B. Rosenquist, M.D., Mary Anne Riley, M.S., Laryssa McCloud, Ph.D., Jill C. Newman, M.S., Doug Case, Ph.D., Meredith Rumble, Ph.D., Andrew D. Krystal, M.D., M.S.

**Objetivo:** El insomnio está asociado con un riesgo aumentado de suicidio. La Administración estadounidense de Alimentos y Fármacos (FDA, por sus siglas en inglés) ha ordenado se incluyan advertencias sobre suicidio en la información de prescripción de los medicamentos hipnóticos. Los autores realizaron una revisión de la evidencia a favor y en contra de la afirmación que los hipnóticos aumentan el riesgo de suicidio.

**Método:** Esta revisión se centró en hipnóticos modernos, aprobados por la FDA. Se inició con la introducción de benzodiazepinas y limitó sus hallazgos a los adultos. Se realizaron búsquedas en *PubMed* y *Web of Science*, cruzando los términos «suicidio» y «suicida» con cada uno de los hipnóticos modernos aprobados por la FDA. Se hicieron búsquedas en el sitio web de la FDA de revisiones de seguridad después de la comercialización y se solicitaron a la FDA reportes de caso de las muertes por suicidio relacionadas con hipnóticos reportadas a través de su Sistema de Reporte de Eventos Adversos.

**Resultados:** Estudios epidemiológicos muestran que los hipnóticos están asociados con un riesgo aumentado de suicidio.

Sin embargo, ninguno de estos estudios controló de forma adecuada la depresión u otros trastornos psiquiátricos que pueden estar relacionados con el insomnio. Las muertes por suicidio se han reportado por sobredosis de hipnóticos de un solo agente. Otra preocupación es que los hipnóticos agonistas de los receptores de benzodiazepinas pueden causar otros trastornos del sueño, que en raras ocasiones pueden conducir a la ideación suicida o al comportamiento suicida en personas que no se sabía tenían tales tendencias suicidas. Por otro lado, investigaciones en curso están evaluando si el tratamiento del insomnio puede reducir la suicidalidad en los adultos con depresión.

**Conclusiones:** Los hallazgos de esta revisión indican que los medicamentos hipnóticos están asociados con la ideación suicida. Futuros estudios deben estar diseñados en forma que permita evaluar si los aumentos en índices de suicidio son debidos a déficits del SNC inducidos por un medicamento hipnótico concreto, o si dichos medicamentos reducen el suicidio debido a la mejoría del insomnio.

(*Am J Psychiatry* 2017; 174:18–25)

## Mecanismos de atención reducida a los ojos en autismo

Jennifer M. Moriuchi, M.A., Ami Klin, Ph.D., Warren Jones, Ph.D.

**Objetivo:** Normalmente se citan dos hipótesis, aversión a la mirada e indiferencia a la mirada, para explicar un aspecto distintivo del diagnóstico de autismo: atención reducida a los ojos de los demás. Las dos hipótesis plantean diferentes áreas de función cerebral atípica, diferentes modelos patogénicos de discapacidad y diferentes tratamientos posibles. La evidencia a favor y en contra de cada una de las hipótesis es mixta, pero hasta ahora la investigación se ha centrado en niños mayores y adultos. Los autores evaluaron ambas hipótesis mecanísticas en dos series de experimentos en el momento del diagnóstico inicial.

**Método:** Se recogieron datos de rastreo ocular en 86 niños de 2 años: 26 con autismo, evaluados en el diagnóstico inicial; 38 niños con desarrollo normal; y 22 con retraso en el desarrollo. En dos experimentos, los autores midieron la respuesta a la indicación directa e implícita para mirar a los ojos.

**Resultados:** Cuando se les indicaba directamente que miraran a los ojos, los niños de 2 años con autismo no apartaban

la vista más rápido que los niños con desarrollo normal; su latencia no varió de manera categórica ni dimensional según el grado de señal (estímulo) (explícita o implícita) que recibieran. Además, las señales directas tuvieron un efecto sostenido más fuerte: los niños autistas se quedaron mirando a los ojos más tiempo que los niños con desarrollo normal. Cuando se les presentaron estímulos sociales implícitos para que miraran a los ojos, los niños de 2 años con autismo no apartaron la vista ni la fijaron de manera más sutil en lugares periféricos.

**Conclusiones:** Los resultados falsifican la hipótesis de la aversión a la mirada. En lugar de eso, a la hora del diagnóstico inicial, el hecho de que en autismo se mire poco a los ojos es consistente con la insensibilidad pasiva a las señales sociales en los ojos de los demás.

*(Am J Psychiatry 2017; 174:26–35)*

## El transportador de norepinefrina en el trastorno depresivo mayor: Un estudio PET

Sho Moriguchi, M.D., Makiko Yamada, Ph.D., Harumasa Takano, M.D., Ph.D., Tomohisa Nagashima, M.D., Ph.D., Keisuke Takahata, M.D., Ph.D., Keita Yokokawa, M.A., Takehito Ito, Ph.D., Tatsuya Ishii, M.D., Yasuyuki Kimura, M.D., Ph.D., Ming-Rong Zhang, Ph.D., Masaru Mimura, M.D., Ph.D., Tetsuya Suhara, M.D., Ph.D.

**Objetivo:** Se ha sugerido que el transportador de norepinefrina juega un papel crucial en el trastorno depresivo mayor. Sin embargo, se desconoce la disponibilidad del transportador de norepinefrina en el trastorno depresivo mayor y su papel en los síntomas clínicos. Los autores evaluaron la disponibilidad del transportador de norepinefrina en pacientes con trastorno depresivo mayor con el objetivo de identificar cualquier asociación entre los resultados de la prueba y los síntomas clínicos.

**Método:** La investigación actual fue un estudio transversal en el que a 19 pacientes con trastorno depresivo mayor y 19 sujetos sanos de comparación de las mismas edades y sexo, se les hizo un escaneo de tomografía por emisión de positrones para evaluar la disponibilidad del transportador de norepinefrina medida por el radioligando (S,S)-[18F]FMEN-D2. La disponibilidad del transportador de norepinefrina en el tálamo y sus subregiones se cuantificó en términos de potencial de unión no desplazable (BPND, por sus siglas

en inglés). Los autores también analizaron la asociación entre la disponibilidad del transportador de norepinefrina y los síntomas clínicos.

**Resultados:** En comparación con los sujetos sanos, los pacientes con trastorno depresivo mayor mostraron valores de BPND un 29,0% más altos en el tálamo y, en particular, valores un 28,2% más altos en la subregión talámica anatómicamente conectada con la corteza prefrontal. La elevada disponibilidad del transportador de norepinefrina en el tálamo en los pacientes se correlacionó de manera positiva con la atención, medida por el *Test del Trazo (Trail Making Test)*, Parte A.

**Conclusiones:** Estos hallazgos revelaron una transmisión alterada de norepinefrina en pacientes con trastorno depresivo mayor, sugiriendo que dicha alteración podría estar relacionada con la atención en esta población de pacientes.

(*Am J Psychiatry* 2017; 174:36–41)

## Trastornos neurometabólicos: Anomalías potencialmente tratables en pacientes con depresión refractaria al tratamiento y comportamiento suicida

Lisa A. Pan, M.D., Petra Martin, B.S., Thomas Zimmer, B.S., Anna Maria Segreti, B.S., Sivan Kassiff, B.S., Brian W. McKain, R.N., M.S.N., Cynthia A. Baca, R.N., M.S.N., Manivel Rengasamy, M.D., Keith Hyland, Ph.D., Nicolette Walano, M.S., Robert Steinfeld, M.D., Marion Hughes, M.D., Steven K. Dobrowolski, Ph.D., Michele Pasquino, B.S., Rasim Diler, M.D., James Perel, Ph.D., David N. Finegold, M.D., David G. Peters, Ph.D., Robert K. Naviaux, M.D., Ph.D., David A. Brent, M.D., Jerry Vockley, M.D., Ph.D.

**Objetivo:** La depresión refractaria al tratamiento es una enfermedad devastadora con morbilidad, mortalidad y coste social significativos. Por lo menos el 15% de los casos de trastorno depresivo mayor siguen siendo refractarios al tratamiento. Los autores identificaron previamente un adulto joven con depresión refractaria al tratamiento y múltiples intentos suicidas con una deficiencia severa de tetrahidrobiopterina en el LCR, un co-factor crítico para la síntesis de los neurotransmisores monoaminérgicos. El tratamiento con sapropterina, un análogo de la tetrahidrobiopterina, tuvo como resultado una remisión drástica y duradera de la depresión. Este caso "centinela" llevó a los autores a formular la hipótesis de que no se da suficiente reconocimiento a la incidencia de las anomalías metabólicas que contribuyen a la depresión refractaria al tratamiento.

**Método:** Los autores llevaron a cabo, con objetivos claros, una evaluación metabólica de casos y controles en 33 pacientes adolescentes y adultos jóvenes con historiales detallados de depresión refractaria al tratamiento (como mínimo tres tratamientos con medicación en la dosis máxima y de duración adecuada) y 16 sujetos sanos de comparación. Los perfiles metabólicos del plasma, la orina y el LCR se llevaron a cabo por medio de espectrometría de masas acoplada a la cromatografía de gases y cromatografía líquida de

alta eficacia acoplada a la espectrometría de masas en tándem a través de ionización por "electrospray".

**Resultados:** Se identificaron anomalías de los metabolitos del LCR en 21 de los 33 participantes con depresión refractaria al tratamiento. La deficiencia de folato cerebral (N=12) fue la más común, con niveles normales de folato sérico y niveles bajos de 5-metiltetrahidrofolato (5-MTHF) en el LCR. Todos los pacientes con deficiencia de folato cerebral, incluyendo uno con niveles bajos de 5-MTHF en el LCR e intermedios de tetrahidrobiopterina, mostraron mejoría en los inventarios de síntomas de la depresión después del tratamiento con ácido folínico; el paciente con baja tetrahidrobiopterina también recibió sapropterina. Ninguno de los sujetos sanos de comparación tenía ninguna anomalía de los metabolitos.

**Conclusiones:** Con el examen de trastornos metabólicos en la depresión refractaria al tratamiento se identificó un número inesperadamente alto de pacientes con anomalías potencialmente tratables. La etiología de dichas anomalías todavía no se ha determinado.

(*Am J Psychiatry* 2017; 174:42–50)

## Hacia el diagnóstico confiable del trastorno disfórico premenstrual del DSM-5: El sistema de puntuación para la evaluación premenstrual C-PASS (*Carolina Premenstrual Assessment Scoring System*)

Tory A. Eisenlohr-Moul, Ph.D., Susan S. Girdler, Ph.D., Katja M. Schmalenberger, M.S., Danyelle N. Dawson, M.A., Pallavi Surana, B.S., Jacqueline L. Johnson, Dr.P.H., David R. Rubinow, M.D.

**Objetivo:** A pesar de la evidencia de la validez del trastorno disfórico premenstrual (TDPM) y la inclusión del trastorno en el DSM-5, las prácticas diagnósticas variables comprometen la validez de constructo del diagnóstico y amenazan la claridad de los esfuerzos para entender y tratar su fisiopatología subyacente. En un esfuerzo para acelerar y simplificar la traducción de los criterios del DSM-5 para el TDPM en términos compatibles con las prácticas investigativas existentes, los autores presentan el desarrollo y la validación inicial del Sistema de Puntuación para la Evaluación Premenstrual de Carolina (C-PASS, por sus siglas en inglés). El C-PASS (disponible como hoja de trabajo, macro de Excel y macro de SAS) es un sistema de puntuación estandarizado para hacer diagnósticos de TDPM de acuerdo al DSM-5, utilizando dos o más meses de evaluaciones de síntomas con el Registro Diario de la Severidad de los Problemas (DRSP, por sus siglas en inglés).

**Método:** Doscientas mujeres reclutadas por síntomas emocionales premenstruales registrados retrospectivamente ofrecieron de dos a cuatro meses de evaluaciones de sínto-

mas en el DRSP. Se compararon los diagnósticos hechos por clínicos expertos y los hechos con el C-PASS.

**Resultados:** El acuerdo entre el diagnóstico con C-PASS y el diagnóstico de los expertos clínicos fue excelente; en general, la clasificación correcta del C-PASS se estimó en 98%. En consonancia con la evidencia anterior, los informes retrospectivos de los aumentos de síntomas premenstruales fueron un predictor pobre del diagnóstico prospectivo del C-PASS.

**Conclusiones:** El C-PASS es un protocolo complementario válido del DRSP, que estandariza y simplifica el diagnóstico complejo y de múltiples niveles del TDPM del DSM-5. El uso consistente de este poderoso método de diagnóstico resultaría en muestras más claramente definidas y homogéneas de mujeres con TDPM, mejorando así la claridad de los estudios que buscan caracterizar y tratar la fisiopatología subyacente del trastorno.

(*Am J Psychiatry* 2017; 174:51–59)

## Alteraciones del volumen subcortical claramente definidas en el TOC pediátrico y adulto: Un meta- y mega-análisis mundial

Premika S.W. Boedhoe, M.Sc., Lianne Schmaal, Ph.D., Yoshinari Abe, M.D., Stephanie H. Ameis, M.D., Paul D. Arnold, M.D., Ph.D., Marcelo C. Batistuzzo, Ph.D., Francesco Benedetti, M.D., Jan C. Beucke, Ph.D., Irene Bollettini, Psy.D., Anushree Bose, M.A., Silvia Brem, Ph.D., Anna Calvo, M.Sc., Yuqi Cheng, Ph.D., Kang Ik K. Cho, B.Sc., Sara Dallaspezia, M.D., Damiaan Denys, M.D., Ph.D., Kate D. Fitzgerald, M.D., Jean-Paul Fouche, M.Sc., Mònica Giménez, Ph.D., Patricia Gruner, Ph.D., Gregory L. Hanna, M.D., Derrek P. Hibar, Ph.D., Marcelo Q. Hoexter, M.D., Ph.D., Hao Hu, M.D., Ph.D., Chaim Huyser, M.D., Ph.D., Keisuke Ikari, M.D., Neda Jahanshad, Ph.D., Norbert Kathmann, Ph.D., Christian Kaufmann, Ph.D., Kathrin Koch, Ph.D., Jun Soo Kwon, M.D., Ph.D., Luisa Lazaro, M.D., Ph.D., Yanni Liu, Ph.D., Christine Lochner, Ph.D., Rachel Marsh, Ph.D., Ignacio Martínez-Zalacain, M.Sc., David Mataix-Cols, Ph.D., José M. Menchón, M.D., Ph.D., Luciano Minuzzi, M.D., Ph.D., Takashi Nakamae, M.D., Ph.D., Tomohiro Nakao, M.D., Ph.D., Janardhanan C. Narayanaswamy, M.D., Fabrizio Piras, Ph.D., Federica Piras, Ph.D., Christopher Pittenger, M.D., Ph.D., Y.C. Janardhan Reddy, M.D., Joao R. Sato, Ph.D., H. Blair Simpson, M.D., Ph.D., Noam Soreni, M.D., Carles Soriano-Mas, Ph.D., Gianfranco Spalletta, M.D., Ph.D., Michael C. Stevens, Ph.D., Philip R. Szeszko, Ph.D., David F. Tolin, Ph.D., Ganesan Venkatasubramanian, M.D., Ph.D., Susanne Walitza, M.D., M.Sc., Zhen Wang, M.D., Ph.D., Guido A. van Wingen, Ph.D., Jian Xu, Ph.D., Xiufeng Xu, M.D., Je-Yeon Yun, M.D., Ph.D., Qing Zhao, M.D., ENIGMA OCD Working Group, Paul M. Thompson, Ph.D., Dan J. Stein, M.D., Ph.D., Odile A. van den Heuvel, M.D., Ph.D.

**Objetivo:** Los estudios de imágenes cerebrales estructurales en trastorno obsesivo compulsivo (TOC) han producido hallazgos inconsistentes. Esto puede ser debido parcialmente al poder estadístico limitado de muestras relativamente pequeñas y a la heterogeneidad clínica relacionada con la variación en el perfil de la enfermedad y en la etapa de desarrollo. Para hacer frente a estas limitaciones, los autores realizaron meta- y mega-análisis de datos de sitios web sobre el TOC de todo el mundo.

**Método:** Se analizaron imágenes T1 de 1.830 pacientes con TOC y 1.759 sujetos de control utilizando procesamiento coordinado y estandarizado, para identificar volúmenes cerebrales subcorticales que fueran diferentes entre los pacientes con TOC y los sujetos sanos. Los autores realizaron un meta-análisis de las medidas medias de los hemisferios izquierdo y derecho de cada estructura subcortical, y después realizaron un mega-análisis incluyendo estas medidas volumétricas de todos los sitios. Los autores también examinaron potenciales efectos moduladores de las características clínicas en las diferencias morfológicas en los pacientes con TOC.

**Resultados:** El meta-análisis indicó que los pacientes adultos tenían volúmenes del hipocampo significativamente meno-

res ( $d$  de Cohen =  $-0,13$ ; % de diferencia =  $-2,80$ ) y volúmenes del globus pallidus significativamente mayores ( $d=0,16$ ; % de diferencia =  $3,16$ ) con comparación con los controles adultos. Ambos efectos fueron más marcados en los pacientes medicados en comparación con los controles ( $d=-0,29$ , % de diferencia =  $-4,18$ ; y  $d=0,29$ , % de diferencia =  $4,38$ , respectivamente). Los pacientes pediátricos no medicados tuvieron volúmenes del tálamo significativamente mayores ( $d=0,38$ ; % de diferencia =  $3,08$ ) en comparación con los controles pediátricos. Ninguno de estos hallazgos fue mediado por características de la muestra, como la edad media o fuerza del campo magnético del escáner. Los resultados del mega-análisis fueron similares.

**Conclusiones:** Los resultados indican diferentes patrones de anomalías subcorticales en los pacientes con TOC pediátricos y adultos. El globus pallidus y el hipocampo parecen ser importantes en el TPC adulto, mientras que el tálamo parece ser esencial en el TOC pediátrico. Estos hallazgos resaltan la importancia potencial de las alteraciones del neurodesarrollo en el TOC y sugieren que puede ser útil hacer más investigación en neuroplasticidad en el TOC.

(*Am J Psychiatry* 2017; 174:60–69)



## El aumento de la actividad o de la energía como un criterio primario para el diagnóstico de la manía bipolar en el DSM-5: Hallazgos del estudio STEP-BD

Rodrigo Machado-Vieira, M.D., Ph.D., David A. Luckenbaugh, M.A., Elizabeth D. Ballard, Ph.D., Ioline D. Henter, M.A., Mauricio Tohen, M.D., Dr.P.H., Trisha Suppes, M.D., Ph.D., Carlos A. Zarate, Jr., M.D.

**Objetivo:** El DSM-5 describe «un período bien definido de estado de ánimo anormal y persistentemente elevado, expansivo o irritable, y un aumento anormal y persistente de la actividad o la energía» como un criterio primario de manía. De este modo, el aumento de la actividad o de la energía ahora se considera un síntoma clave de los episodios maníacos e hipomaniacos. Utilizando datos del Programa de mejora del tratamiento sistemático para trastorno bipolar (STEP-BD, por sus siglas en inglés), los autores analizaron datos de prevalencia puntual obtenidos en la visita inicial para evaluar la validez del diagnóstico de este nuevo criterio del DSM-5. La hipótesis del estudio fue que el criterio del DSM-5 alteraría la prevalencia de la manía y/o de la hipomanía.

**Método:** Los autores compararon la prevalencia, las características clínicas, los validadores y el resultado en pacientes que reunían los criterios del DSM-5 (es decir, los criterios del DSM-IV más el criterio del DSM-5 de aumento de la actividad o de la energía) y en otros que no cumplían el nuevo

criterio del DSM-5 (es decir, que solamente cumplían los criterios del DSM-IV).

**Resultados:** Todos los 4.360 participantes cumplían los criterios del DSM-IV para trastorno bipolar, y 310 cumplían los criterios del DSM-IV para un episodio maníaco o hipomaniaco. Cuando se añadió el nuevo criterio del DSM-5 de aumento de la actividad o de la energía como un síntoma co-primario, la prevalencia de la manía y de la hipomanía disminuyó. Aunque se percibieron diferencias menores en los validadores concurrentes y clínicos, no se observó ningún cambio en los resultados longitudinales.

**Conclusiones:** Los hallazgos confirman que incluir el aumento de la actividad o de la energía como parte del criterio A del DSM-5, disminuye la prevalencia de los episodios maníacos e hipomaniacos pero no afecta los resultados clínicos longitudinales.

*(Am J Psychiatry 2017; 174:70–76)*
