## Subscription and Business Information

*The American Journal of Psychiatry*, ISSN 0002-953X, is published monthly by the American Psychiatric Association.

The American Psychiatric Association does not hold itself responsible for statements made in its publications by contributors or advertisers. Unless so stated, material in *The American Journal of Psychiatry* does not reflect the endorsement, official attitude, or position of the American Psychiatric Association or of the Journal's Editorial Board.

Periodicals postage paid at Arlington, VA, and additional mailing offices. POSTMASTER: Send address changes to *The American Journal of Psychiatry*, Circulation Department, American Psychiatric Association, 1000 Wilson Blvd., Suite 1825, Arlington, VA 22209-3901.

### Editorial Office

*American Journal of Psychiatry*  
American Psychiatric Association  
1000 Wilson Blvd., Suite 1825  
Arlington, VA 22209-3901  
Phone: (703) 907-7885, (703) 907-7889  
E-mail: [ajp@psych.org](mailto:ajp@psych.org)

### Customer Service

Phone: (800) 368-5777 (toll-free)  
E-mail: [appi@psych.org](mailto:appi@psych.org)

### APA Member Subscription Services

Phone: (888) 35-PSYCH (toll-free)

### Subscriptions

Per year: individual \$318.00,  
international \$478.00

Institutional subscriptions are tier priced. For institutional site license or pricing information, contact (703) 907-8538 or [institutions@psych.org](mailto:institutions@psych.org).

*Additional subscription options, including single issues and student rates*

Contact Customer Service

### Advertising

*Pharmaceutical Print and Online Advertising*  
Frank Cox, Kathleen Harrison, Tim Wolfinger  
Pharmaceutical Media, Inc.  
30 East 33rd Street  
New York, NY 10016  
Phone: (212) 904-0379  
E-mail: [twolfinger@pminy.com](mailto:twolfinger@pminy.com)

*Nonpharmaceutical and Online Sales*

Eamon Wood  
Pharmaceutical Media, Inc.  
E-mail: [ewood@pminy.com](mailto:ewood@pminy.com)  
(see address and phone above).

### Permissions and Reprints

Material published in the journals of the American Psychiatric Association and American Psychiatric Association Publishing is protected by copyright and all rights are reserved. Material may not be reproduced in any form or by any means without written permission from the copyright owner. For permission to reproduce material published by APA, please visit [http://www.appi.org/Customer\\_Service/Pages/Permissions.aspx](http://www.appi.org/Customer_Service/Pages/Permissions.aspx) for more information. Permission can also be secured through the Copyright Clearance Center ([www.copyright.com](http://www.copyright.com)).

APA does not require that permission be obtained for the photocopying of isolated articles for nonprofit classroom or library reserve use; all fees associated with such permission are waived. This consent does not extend to other kinds of copying, such as copying for general distribution, for advertising or promotional purposes, for creating new collective works, or for resale. Requests for commercial distribution should be directed to (703) 907-7875.

For bulk reprints, please contact Jane Cha, (703) 907-7889; email: [jcha@psych.org](mailto:jcha@psych.org).

Indexed in Abstracts for Social Workers, Academic Abstracts, Biological Abstracts, Chemical Abstracts, Chicago Psychoanalytic Literature Index, Cumulative Index to Nursing Literature, Excerpta Medica, Hospital Literature Index, Index Medicus, International Nursing Index, Nutrition Abstracts, Psychological Abstracts, Science Citation Index, Social Science Source, and Social Sciences Index.

Pages are produced by Dartmouth Journal Services, Waterbury, VT, and printed by Dartmouth Printing Company, Hanover, NH, on acid-free paper effective with Volume 169, Number 1, January 2012.

© 2017 American Psychiatric Association.

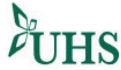

United Health Services Hospitals (UHS), the regional leader in healthcare, is seeking two BC/BE Adult Psychiatrists that have completed a three-year Psychiatry residency to join our multi-disciplinary team located in Binghamton and Johnson City, New York for In-Patient opportunities. Candidates must be able to apply and obtain a NYS Medical License and hold a MD degree (foreign equivalent acceptable).

Our Psychiatrists carry an inpatient case load of approximately 12, where patients will likely be in three inpatient units. Units include: a high security unit with 17 beds; a geropsych unit with a strong ECT program for both inpatient and outpatient treatment; and a 22 bed general psych unit which provides stabilization and treatment for patients who are appropriate for a locked, but less secure than the high security unit. Physicians work with an interdisciplinary treatment team for each patient. The behavioral health program staff works as a collaborative team. Psychiatrists, social workers, nurses, counselors and other disciplines work together to plan and deliver care to patients.

There are opportunities for teaching residents and medical students from Upstate Medical University in Syracuse, as well as the ability to participate in clinical research. Competitive starting salary, excellent benefits and malpractice insurance provided.

**Contact:**

Lori Walling, UHS Physician Recruitment  
**Email:** lori\_walling@uhs.org | **Phone:** (607) 763-6392  
**website:** www.uhs.net

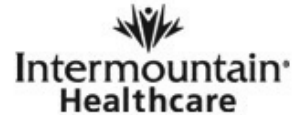

*Helping People Live the Healthiest Lives Possible.*

Psychiatrists (adult and child), Emergency-Access Center & Substance Use Disorder are currently needed in:  
**Ogden • Provo • Salt Lake City • St. George**

-Psychiatry Medical Director opening in Provo

Employment with Intermountain Medical Group. Competitive salary with transition to production and additional income for meeting quality goals. Stipend available. Signing bonus and loan repayment available. Full Intermountain benefits to include defined pension, 401k match & CME. Relocation provided up to 15K.

For the second year in a row, Forbes magazine has named Intermountain one of the top 3 healthcare organizations, a top 25 employer overall

Contact Intermountain Physician Recruiting.  
 800-888-3134 **PhysicianRecruit@imail.org**  
<http://physicianjobsintermountain.org>

# MISSISSIPPI

## Outpatient Psychiatrist

Based in Tupelo, NMMC has a full-time opening for a psychiatrist to practice in an outpatient clinic in Oxford. Enjoy the good life while treating adult patients between 8 a.m. and 5 p.m. weekdays with no call responsibility in a city that is touted as the "Cultural Mecca of the South."

Oxford is known for its rich history and small town charm, as well as being home to the University of Mississippi and the Ole Miss Rebels.

NMMC, a 650-bed regional referral center in Tupelo, is the largest, private, not-for-profit hospital in Mississippi and the largest non-metropolitan hospital in America.

NMMC-Tupelo is affiliated with North Mississippi Health Services, a 2012 Malcolm Baldrige National Quality Award recipient.

Board-certification preferred.

For more information about this practice opportunity, call (662) 377-3882 or email smaxcy@nmhs.net.

What connected feels like™

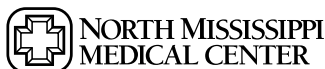

**NORTH MISSISSIPPI MEDICAL CENTER**  
 BEHAVIORAL HEALTH CENTER  
[www.nmhs.net/behavioral\\_health.php](http://www.nmhs.net/behavioral_health.php)

## CHAIRPERSON, DEPARTMENT OF PSYCHIATRY

Lenox Hill Hospital

Lenox Hill Hospital, the Manhattan tertiary medical center of Northwell Health, is seeking a new Department of Psychiatry Chairperson. This exciting position offers the opportunity to lead and continue to develop an academically-oriented behavioral health center of excellence on Manhattan's Upper East Side.

The Department serves diverse patient populations on its adult inpatient unit, New York State Office of Mental Health (OMH)-licensed outpatient clinic serving adults and children, specialized OMH-supported "On-Track" program for patients experiencing first-episode psychosis, electroconvulsive therapy (ECT) inpatient/outpatient program, consultation-liaison service for Lenox Hill's 600+ medical-surgical inpatients, and emergency psychiatry program which also consults in the affiliated Greenwich Village Healthplex, a unique free-standing emergency room.

A well-regarded training site for rotating psychiatry residents and psychology trainees, opportunities also exist for expanded psychiatric clerkship and elective options for medical students enrolled in our Hofstra Northwell School of Medicine, one of the newest and most progressive medical schools in the country; and for psychiatric nurse practitioner and physician assistant students from our Hofstra Northwell School of Graduate Nursing and Physician Assistant Studies. Interested and qualified candidates may initiate projects in and/or collaborate with Northwell's Center for Psychiatric Neuroscience at its Feinstein Institute for Medical Research and Zucker Hillside Hospital sites.

Through collaboration with Northwell's Behavioral Health Service Line, the Lenox Hill Department of Psychiatry is able to interact with many innovative system-wide activities including emergency tele-psychiatry; a CMS-funded practice transformation network; Northwell's health insurance company, CareConnect, and its care management/population health enterprise, Health Solutions; the behavioral health performance improvement coordinating group, pharmacy and therapeutics committee, and incident review committee; the digital behavioral health technology workgroup; collaborative care models; and an ambulatory provider network, IPA, and behavioral health group practice.

Interested candidates must have or be eligible for a NYS medical license; be ABPN board-certified in Psychiatry; possess consummate leadership skills, program development experience, financial acumen, and a strategic vision to help shape the future direction of a dynamic multi-faceted department; possess an academic portfolio in clinical service delivery, education, or research; be motivated to engage developing value-based payment methodologies and other health care reform initiatives; drive optimal quality, patient satisfaction, and staff engagement indices; and thoughtfully interact with both Lenox Hill and Northwell Health clinical and administrative leaders.

We offer a highly competitive compensation and benefits package. Academic appointment with the Hofstra-Northwell School of Medicine is commensurate with credentials and experience.

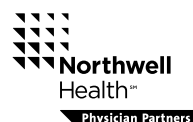

For further information and to apply, please contact the Office of Physician Recruitment, Northwell Health: [OPR@northwell.edu](mailto:OPR@northwell.edu)

EOE M/F/D/V

# Subscribe today to the highly ranked mental health journal in the Health Policy & Services category!\*

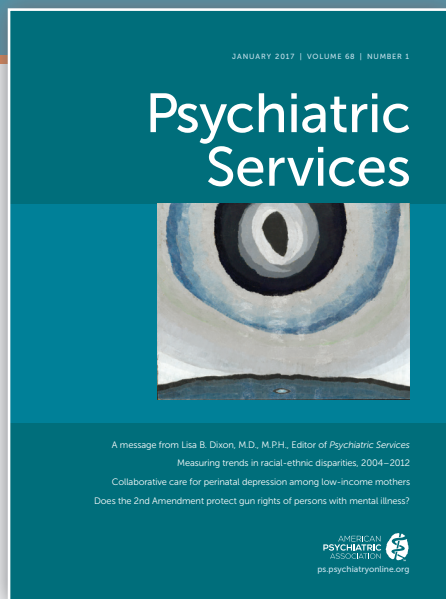

## Don't miss the January issue:

- Inaccurate depictions of acute schizophrenia on YouTube
- Measuring trends in mental health care disparities, 2004–2012
- Self-direction in mental health: an international learning exchange
- Autism among U.S. school children: diagnosis and service use

## ▶ Coming in the February issue:

- Introducing a new column: Technology in Mental Health
- Integrating health care interventions into ACT programs
- Theoretical and empirical support for measurement-based care
- State variation in SSI enrollment for children with mental disabilities

## ▶ One low price covers your print and online subscription.

\$ 115 APA Member print and online subscription.

\$ 105 APA Member online-only subscription.

# ps.psychiatryonline.org

**Subscribe today at [www.appi.org](http://www.appi.org) or call  
Customer Service at 1-800-368-5777.**

\*By its most recent Impact Factor (2.335), *Psychiatric Services* is highly ranked in the Health Policy & Services Category of ISI's Journal Citation Reports. Of the 74 peer-reviewed journals included in the Health Policy & Services Category, *Psychiatric Services* ranks 19th.

AMERICAN  
PSYCHIATRIC  
ASSOCIATION  
PUBLISHING

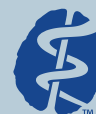

[www.appi.org](http://www.appi.org)

# We've got you covered.

For over 30 years, we have provided psychiatrists with exceptional protection and personalized service. We offer comprehensive insurance coverage and superior risk management support through an "A" rated carrier.

## ANNOUNCING NEW ENHANCEMENTS TO THE AMERICAN PSYCHIATRIC ASSOCIATION PSYCHIATRISTS' PROFESSIONAL LIABILITY PROGRAM:

- **Defense Expenses related to Licensing Board Hearings and Other Proceedings:** Increased Limit to \$50,000 per proceeding with NO annual aggregate (higher limits are available up to \$150,000)
- **Fire Legal Liability Coverage:** Limit of liability increased to \$150,000 for fire damage to third party property
- **Emergency Aid Coverage:** Reimbursement up to \$15,000 in costs and expenses for medical supplies
- Insured's **Consent to Settle** is now required in the settlement of any claim – No arbitration clause!
- **First Party Assault and Battery Coverage:** Up to \$25,000 reimbursement for medical expenses related to injuries and/or personal property damage caused by a patient or client
- **Medical Payments Coverage:** Increased limit to \$100,000 for Medical Payments to a patient or client arising from bodily injury on your business premises

## IN ADDITION WE CONTINUE TO OFFER THE FOLLOWING MULTIPLE PREMIUM DISCOUNTS:

- **50% Resident-Fellow Member Discount**
- **Up to 50% New Doctor Discount** (for those who qualify)
- **50% Part Time Discount** for up to 20 client hours a week or less
- **10% New Policyholder Discount** (must be claims free for the last 6 months)
- **15% Child and Adolescent Psychiatrist Discount** for those whose patient base is more than 50% Children and Adolescents
- **10% Claims Free Discount** for those practicing 10 years, after completion of training, and remain claims free
- **5% Risk Management Discount** for 3 hours of CME

*(Above Coverage Features and Discounts are subject to individual state approval)*

Visit us at [apamalpractice.com](http://apamalpractice.com) or call **877.740.1777** to learn more.

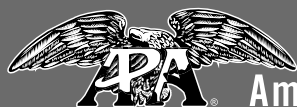

**American Professional Agency**

LEADERS IN PSYCHIATRIC MEDICAL LIABILITY INSURANCE

ENDORSED BY THE  
AMERICAN PSYCHIATRIC  
ASSOCIATION
