# The American Journal of Psychiatry

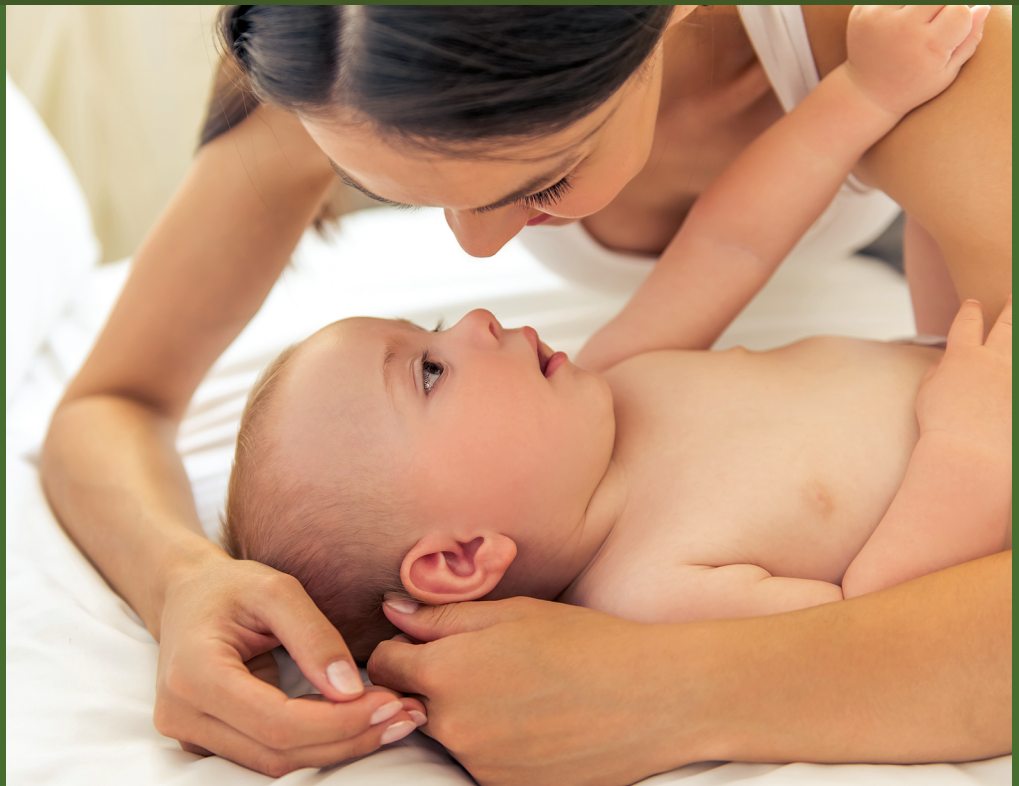

Mechanisms of Diminished Attention to Eyes in Autism

Hypnotic Medications and Suicide:  
Risk, Mechanisms, Mitigation, and the FDA

Neurometabolic Disorders: Potentially Treatable  
Abnormalities in Patients With Treatment-Refractory  
Depression and Suicidal Behavior

Toward the Reliable Diagnosis of DSM-5  
Premenstrual Dysphoric Disorder
