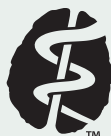

# The American Journal of Psychiatry

Official Journal of the American Psychiatric Association

## Officers 2016–2017

### President

Maria A. Oquendo, M.D., Ph.D.

### President-Elect

Anita S. Everett, M.D.

### Treasurer

Bruce J. Schwartz, M.D.

### Secretary

Altha J. Stewart, M.D.

### Assembly

#### Speaker

Daniel J. Anzia, M.D.

#### Speaker-Elect

Theresa M. Miskimen, M.D.

#### Recorder

James R. Batterson, M.D.

### Office of the CEO and Medical Director

#### CEO and Medical Director

Saul Levin, M.D., M.P.A.

### Board of Trustees

Uchenna Achebe, M.D., M.P.H.

Jeffrey Akaka, M.D.

Lama Bazzi, M.D.

R. Scott Benson, M.D.

Renée L. Binder, M.D.

Ronald M. Burd, M.D.

Stella Cai, M.D.

Jeffrey L. Geller, M.D., M.P.H.

Jeffrey A. Lieberman, M.D.

Roger Peele, M.D.

Vivian B. Pender, M.D.

Gail E. Robinson, M.D.

Paul Summergrad, M.D.

Richard F. Summers, M.D.

Melinda Young, M.D.

## Editorial Board

### Editor

Robert Freedman, M.D.

### Deputy Editors

David A. Lewis, M.D.

Robert Michels, M.D.

Daniel S. Pine, M.D.

A. John Rush, M.D.

Susan K. Schultz, M.D.

Carol A. Tamminga, M.D.

### Associate Editors

Alan Brown, M.D., M.P.H.

Tyrone Cannon, Ph.D.

Benjamin G. Druss, M.D., M.P.H.

Felton Earls, M.D.

Graham J. Emslie, M.D.

Yasmin Hurd, Ph.D.

Joan L. Luby, M.D.

Constantine G. Lyketsos, M.D., M.H.S.

Helen S. Mayberg, M.D., F.R.C.P.C.

Terrie E. Moffitt, Ph.D.

Rajesh Narendran, M.D.

Roy Perlis, M.D.

Anita Thapar, M.B.B.Ch., F.R.C.Psych.,

Ph.D., F.Med.Sci.

Mauricio Tohen, M.D., Dr.PH., M.B.A.

Eduard Vieta, M.D., Ph.D.

Katherine L. Wisner, M.D., M.S.

Xin Yu, M.D.

### Editor Emerita

Nancy C. Andreasen, M.D., Ph.D.

### Former Editors

Amariah Brigham, M.D., 1844–1849

T. Romeyn Beck, M.D., 1849–1854

John P. Gray, M.D., 1854–1886

G. Alder Blumer, M.D., 1886–1894

Richard Dewey, M.D., 1894–1897

Henry M. Hurd, M.D., 1897–1904

Edward N. Brush, M.D., 1904–1931

Clarence B. Farrar, M.D., 1931–1965

Francis J. Braceland, M.D., 1965–1978

John C. Nemiah, M.D., 1978–1993

### Editorial Staff

#### Executive Editor

Michael D. Roy

#### Senior Editors

John J. Guardiano, Ph.D.

Jane Weaver

#### Production Manager

Susan Westrate

#### Assistant Editor

Angela Moore

#### Online Content Manager

Michael Pogachar

#### Editorial Support Services Manager

Heidi Koch

#### Editorial Assistant

Linda LaCour

#### Spanish Content Manager

Sergi Casals, M.A.

#### Assistants to the Editors

Lois Lilienthal

Laura English

Rachel Hogg

Russell A. Scholl

### Publisher

Rebecca D. Rinehart

# The Residents' JOURNAL

The American Journal of  
**Psychiatry**  
Residents' Journal

December 2016      Volume 11      Issue 12

Inside

**2 Lighthouse to Guide Our Use of Social Media as Psychiatrists and in Training**  
Spencer Kimball Hansen, M.D.  
*Emphasis on the Hippocratic Oath as a prototype.*

**3 The Virtual Blues: Facebook and Depression in Young Adults**  
Adrian Jacques H. Ambrose, M.D.  
*Understanding depressive statements and activities on Facebook, characterizing usage, and exploring supportive intervention.*

**7 Facebook Addiction: An Emerging Problem**  
Anindita Chakraborty, M.D.  
*Examining online addictive behavior, pathophysiology, risk factors, consequences, and possible treatment approaches.*

**10 Social Media and Web-Based Interventions as a Therapeutic Tool for Young Adults With Psychotic Disorders**  
Jihan A. Woods, M.D.  
*Case report of a typical course in the development of schizophrenia, with discussion of web-based psycho-education, web-based cognitive-behavioral therapy, and virtual clinical monitoring as possible therapeutic strategies.*

**13 Using Social Media to Identify Those With Mental Illness and Substance Use Disorders**  
Shawn E. McNeil, M.D.  
*Commentary on patients' interaction with social media as part of patient history taking.*

**14 Social Media and the Sexualization of Adolescent Girls**  
Stephanie V. Ng, M.D.  
*Investigating adolescents' use and perception of social media.*

**18 Residents' Resources**



© andrey\_13/shutterstock.com

**MGAR physician CAREERLINE** | **FIND THE RIGHT CAREER FOR YOU!** | General/Adult | Addiction | Geriatric Child/Adolescent | Medical Director Primary Care

|                                                                                             |                                                                                |                                                                         |
|---------------------------------------------------------------------------------------------|--------------------------------------------------------------------------------|-------------------------------------------------------------------------|
| <b>EDITOR-IN-CHIEF</b><br>Katherine Pier, M.D.                                              | <b>GUEST EDITOR</b><br>Spencer Kimball Hansen, M.D.                            | <b>MEDIA EDITOR</b><br>Michelle Liu, M.D.                               |
| <b>SENIOR DEPUTY EDITOR</b><br>Rachel Katz, M.D.                                            | <b>ASSOCIATE EDITORS</b><br>Gopalkumar Rakesh, M.D.<br>Janet Charoensook, M.D. | <b>CULTURE EDITOR</b><br>Aparna Atluru, M.D.                            |
| <b>DEPUTY EDITOR</b><br>Oliver Glass, M.D.                                                  |                                                                                | <b>STAFF EDITOR</b><br>Angela Moore                                     |
| <b>EDITORS EMERITI</b><br>Rajiv Radhakrishnan, M.B.B.S., M.D.<br>Misty Richards, M.D., M.S. | Arshya Vahabzadeh, M.D.<br>Monifa Seawell, M.D.<br>Sarah M. Fayad, M.D.        | Joseph M. Cerimete, M.D.<br>Molly McVoy, M.D.<br>Sarah B. Johnson, M.D. |

**Editor-in-Chief**  
Katherine Pier, M.D.

**Senior Deputy Editor**  
Rachel Katz, M.D.

**Deputy Editor**  
Oliver Glass, M.D.

**Associate Editors**  
Gopalkumar Rakesh, M.D.  
Janet Charoensook, M.D.

*The Residents' Journal*, the largest and most robust resident-led journal in the house of medicine, is an e-publication that serves as a forum to share your ideas and experiences in training, clinical practice, research, and careers with your colleagues.

To submit a manuscript, please visit [mc.manuscriptcentral.com/appi-ajp](http://mc.manuscriptcentral.com/appi-ajp) and select a manuscript type for AJP Residents' Journal. You may submit a commentary (500 words), book review (500 words), history of psychiatry (500 words), clinical case conference (1,250 words), review article (1,500 words), treatment in psychiatry article (1,500 words), research article (1,250 words), drug review (1,500 words), or letter to the editor (250 words).

*The Residents' Journal* is sent free-of-charge to all psychiatry residents. Anyone interested in being included on the distribution list should contact Angela Moore, *The Residents' Journal* staff editor at [ajp@psych.org](mailto:ajp@psych.org) with "Subscribe to Residents' Journal" in the subject line.

To access the complete Residents' Journal archives, visit [ajp.psychiatryonline.org/residents\\_journal](http://ajp.psychiatryonline.org/residents_journal)

# THE AMERICAN PSYCHIATRIC ASSOCIATION

1000 Wilson Blvd., Suite 1825, Arlington, VA 22209-3901  
(888) 357-7924 (toll-free inside the U.S. and Canada) / (703) 907-7300  
web site: [www.psychiatry.org](http://www.psychiatry.org) • e-mail: [apa@psych.org](mailto:apa@psych.org)

## Chairpersons of Councils, Committees, and Task Forces

### Standing Committees

|                             |                          |
|-----------------------------|--------------------------|
| <b>Bylaws</b>               | Edythe Harvey, M.D.      |
| <b>Elections</b>            | Barry K. Herman, M.D.    |
| <b>Ethics</b>               | Ezra Griffith, M.D.      |
| <b>Finance and Budget</b>   | Alan F. Schatzberg, M.D. |
| <i>Audit</i>                | Bruce J. Schwartz, M.D.  |
| <i>Investment Oversight</i> | David Fassler, M.D.      |
| <b>Joint Reference</b>      | Anita S. Everett, M.D.   |
| <b>Membership</b>           | Rahn K. Bailey, M.D.     |
| <b>Nominating</b>           | Renee Binder, M.D.       |
| <b>Tellers</b>              | Jose Vito, M.D.          |

### Councils

#### **Council on Addiction Psychiatry**

Frances R. Levin, M.D.

#### **Council on Advocacy and Government Relations**

Debra Pinals, M.D.

*Advocacy and Litigation Funding*

Jeffrey Akaka, M.D.

#### **Council on Children, Adolescents, and Their Families**

Joseph V. Penn, M.D.

#### **Council on Communications**

Christopher Ramsey, M.D.

#### **Council on Geriatric Psychiatry**

Robert P. Roca, M.D.

#### **Council on Healthcare Systems and Financing**

Harsh K. Trivedi, M.D.

*Reimbursement for Psychiatric Care*

Laurence Miller, M.D.

*RBRVS, Codes and Reimbursement*

Gregory G. Harris, M.D.

*Telepsychiatry*

James H. Shore, M.D.

#### **Council on International Psychiatry**

Bernardo Ng, M.D.

#### **Council on Medical Education and Lifelong Learning**

Mark H. Rapaport, M.D.

*Scientific Program*

Philip Muskin, M.D.

*Vestermark Award Committee*

Jonathan F. Borus, M.D.

#### **Council on Minority Mental Health and Health Disparities**

Christina V. Mangurian, M.D.

#### **Council on Psychiatry and Law**

Steven K. Hoge, M.D.

*Judicial Action*

Marvin S. Swartz, M.D.

#### **Council on Psychosomatic Medicine (Consultation Liaison Psychiatry)**

David F. Gitlin, M.D.

#### **Council on Quality Care**

Grayson Norquist, M.D.

*Mental Health Information Technology*

Steven Daviss, M.D.

*Performance Measures*

Karen Pierce, M.D.

*Steering Committee on Practice Guidelines*

Michael J. Vergare, M.D.

#### **Council on Research**

Dwight L. Evans, M.D.

*Psychiatric Dimensions of Disasters*

Robert J. Ursano, M.D.

# Go Online

Visit [ajp.psychiatryonline.org](http://ajp.psychiatryonline.org) for these features!

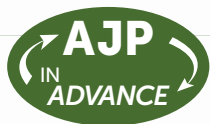

## AJP in Advance

*Discover the latest research advances before they appear in print*

### **Altered Expression of ARP2/3 Complex Signaling Pathway Genes in Prefrontal Layer 3 Pyramidal Cells in Schizophrenia**

Low transcript levels of actin-related protein-2/3 complex subunits were found in schizophrenia subjects' dorsolateral prefrontal cortex layer 3 and 5 pyramidal cells. The resulting structural compromise could be a factor in low dendritic spine density on layer 3 pyramidal cells in schizophrenia.

### **Kahlbaum, Hecker, and Kraepelin and the Transition From Psychiatric Symptom Complexes to Empirical Disease Forms**

Kraepelin's diagnostic approach drew on concepts developed earlier by Karl Kahlbaum and Ewald Hecker, who focused on detailed empirical clinical observation of symptoms and illness course as a means of defining psychiatric disorders.

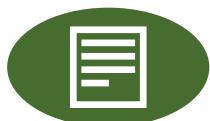

## AJP CME

*Earn CME credit: 3 courses per issue*

This month's courses appear on pages 83–86. Each short course is based on one article in this issue and can earn up to 1 *AMA PRA Category 1 Credit™*. CME credit is issued only **online**, and a paid subscription to AJP's CME course program is required.

Visit [psychiatryonline.org/cme](http://psychiatryonline.org/cme) and click on the "American Journal of Psychiatry" tab.

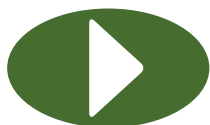

## AJP Multimedia

*Access Audio or Video for highlights of each issue*

In AJP Audio this month, Deputy Editor Susan K. Schultz, M.D., discusses the association of hypnotic medications and suicide, neurometabolic disorders in treatment-refractory depression, diminished attention to eyes in autism, increased activity or energy as a primary criterion for diagnosis of bipolar mania, an instrument for diagnosing premenstrual dysphoric disorder, and how to differentiate the effects of deep brain stimulation in Parkinson's disease from the effects of the disease itself and psychiatric issues.

In this month's video, Deputy Editor Daniel S. Pine, M.D., discusses the articles "Mechanisms of Diminished Attention to Eyes in Autism" and "Distinct Subcortical Volume Alterations in Pediatric and Adult OCD: A Worldwide Meta- and Mega-Analysis."

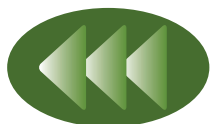

## History of Psychiatry

*Revisit the field's rich history through the pages of AJP*

### **125 years ago this month: Salutary Adjunctive Treatments**

The January 1892 issue contains several articles on nonmedicinal modalities that might be helpful in certain cases in asylums. In "Music in Its Relation to the Mind," Dr. G. Alder Blumer recommends bringing music into the asylum. In "Mechanical Massage," Dr. B.D. Eastman argues for the benefits of using mechanical massage devices (including the hand shaker, the leg shaker, and the leg rubber) in patients whose illness is characterized by "great sluggishness in all the vital operations" and who thus need to exercise but are unable to do so adequately. In "Dietetics in the Treatment and Cure of Insanity," Dr. Selden H. Talcott promotes the use of milk (served *warm*) as a nearly ideal food for the ill.

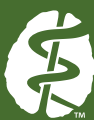

Source: https://psychiatryonline.org/doi/suppl/10.1176/ajp.2017.174.issue-1/suppl_file/front.pdf
